# Supplementary material for: Rice DEP1, encoding a highly cysteine-rich G protein γ subunit, confers cadmium tolerance on yeast cells and plants
Source: PubMed Central journal article supplement (PMC3808331; doi:10.1093/jxb/ert267), 2013-10-25
Supplement: supp_ert267_jexbot098715_file001.pdf [file supp_ert267_jexbot098715_file001.pdf]

## Supplemental methods

### Yeast strain used

Various metal-sensitive mutant strains ( $\Delta pmr1$  for  $Mn^{2+}$ ,  $\Delta zrc1$  for  $Zn^{2+}$ ,  $\Delta rpd3$  for  $Ni^{2+}$ , and  $\Delta cot1$  for  $Co^{2+}$ ) with the following genotypes were used:  $\Delta pmr1$  ( $MAT\alpha$ ;  $his3\Delta1$ ,  $leu2\Delta0$ ,  $lys2\Delta0$ ,  $ura3\Delta0$ ;  $YGL167c::kanMX4$ ),  $\Delta zrc1$  ( $MAT\alpha$ ,  $his3\Delta1$ ,  $leu2\Delta0$ ,  $lys2\Delta0$ ,  $ura3\Delta0$ ;  $YMR243c::kanMX4$ ),  $\Delta rpd3$  ( $MAT\alpha$ ;  $his3\Delta1$ ,  $leu2\Delta0$ ,  $lys2\Delta0$ ,  $ura3\Delta0$ ;  $YNL330c::kanMX4$ ), and  $\Delta cot1$  ( $MAT\alpha$ ,  $his3\Delta1$ ,  $leu2\Delta0$ ,  $lys2\Delta0$ ,  $ura3\Delta0$ ,  $YOR316c::kanMX4$ ).

### Metal specificity of OsDEP1 in yeast

To evaluate the metal specificity of *OsDEP1* in yeast, the antibiotic disc assay method was employed. In brief, the basal vector pGK1 and the pOsDEP1 construct were transformed into the respective metal-sensitive yeast strains and the resulting transformants then used for the assays. The transformed cells, grown in SD-Ura liquid media, were added to 3 ml of SD-Ura media with 0.7% molten agarose maintained at 37°C to give a cell density of  $OD_{600} = 0.1$ , then mixed quickly and poured onto 2% agar-containing SD-Ura basal medium. After solidification of the top agarose media, antibiotic assay discs (diameter 6 mm), containing specific amounts of the appropriate heavy metals, were applied. After 3 days incubation at 30°C, the diameters of the growth inhibition zones were measured.

## Supplemental Table

**Table S1.** Primers used to analyze the expression of heterotrimeric G protein genes in Arabidopsis.

Table S1

| Genes         | Forward primers (5'→3') | Reverse primers(5'→3')      |
|---------------|-------------------------|-----------------------------|
| <i>AtGPA1</i> | ATGGGCTTACTCTGCAGTAG    | TCATAAAAGGCCAGCCTCCA        |
| <i>AtAGB1</i> | CACCATGTCTGTCTCCGAG     | TCAAATCACTCTCCTGTGTGTCTCTCC |
| <i>AtAGG1</i> | GCGAGAGGAACTGTGGTTTACG  | CTACTGCAGCCTTCTCCTCCATTT    |
| <i>AtAGG2</i> | TCCTTGTAATTTTGTATCCA    | AGCCTCTCTCAGAGCTCACCA       |
| <i>AtAGG3</i> | ATGTCTGCTCCTTCTGGCGGT   | CATCTGATCTTGCAGTTGCAG       |

## Supplemental figures

**Fig. S1.** Phylogenetic relationships between OsDEP1 and its orthologs and paralogs in other monocot and dicot plants with the following accession numbers: *Arabidopsis thaliana*, NM\_147870 (AGG3); *Glycine max*, BT095006; *Hordeum vulgare*, FJ039903; *Oryza sativa*, Os09g0441900; *Ricinus communis*, XM\_002516219; *Triticum urartu*, GQ324995; *Vitis vinifera*, CBI27799; and *Zea mays*, NM\_001158725.

**Fig. S2.** Schematic representation of OsDEP1 and its amino acid sequence. OsDEP1 consists of a coiled-coil (CC) domain, a single transmembrane domain sandwiched between two putative nuclear localization signals (NLS), a von Willebrand factor type C module, and ends with the Cys-rich region. The Cys residues comprise 18.93% and 32.96% of the OsDEP1(1-169) and OsDEP1(170-426) regions, respectively. The Cys residues in the OsDEP1 amino acid sequence are highlighted in red.

**Fig. S3.** Response of yeast cells carrying pOsDEP1 to various heavy metals. The responses of yeast cells expressing pOsDEP1 to Cd, Cu, Co, Ni, Zn or Mn were evaluated by an antibiotic assay method (details as described in ‘Materials and Methods’). The basal vector, pGK1 (EV), and pOsDEP1 were transformed into the respective metal-sensitive yeast strains ( $\Delta cup2$  for Cu,  $\Delta cot1$  for Co,  $\Delta rpd3$  for Ni,  $\Delta rcr1$  for Zn and  $\Delta pmr1$  for Mn) and the resulting transformants used in the antibiotic disc assay test. **A**, CdCl<sub>2</sub>; **B**, CuCl<sub>2</sub>; **C**, CoCl<sub>2</sub>; **D**, NiCl<sub>2</sub>; **E**, ZnCl<sub>2</sub>; **F**, MnCl<sub>2</sub>. Data are means  $\pm$  SDs of three independent experiments. Asterisks indicate that the difference from the control (EV) is statistically significant. \*\*\*  $p < 0.001$ .

**Fig. S4.** Growth responses of the loss-of-function mutants of heterotrimeric G protein(s). **A**, Growth responses of control WT (Col-0) and *agg3-1* mutant on control media (0  $\mu$ M) and 75  $\mu$ M CdCl<sub>2</sub>-contained media. **B**, Growth responses of control WT (Col-0) and  $\alpha$  (*gpa1-4*) and  $\beta$  (*agb1-2*) mutants to control (0  $\mu$ M) and 75  $\mu$ M CdCl<sub>2</sub>. **C**, Growth responses of WT and *agg1-1C* mutant in response to control 0  $\mu$ M and 75  $\mu$ M CdCl<sub>2</sub>. **D**, Growth responses of WT and *agb1-1* and triple mutant *agg1-1C agg2-1*

*agg3-1* to control (0  $\mu$ M) and 75  $\mu$ M CdCl<sub>2</sub>. The experiments were repeated three times and similar results were obtained. The representative photos were shown.

Figure S1

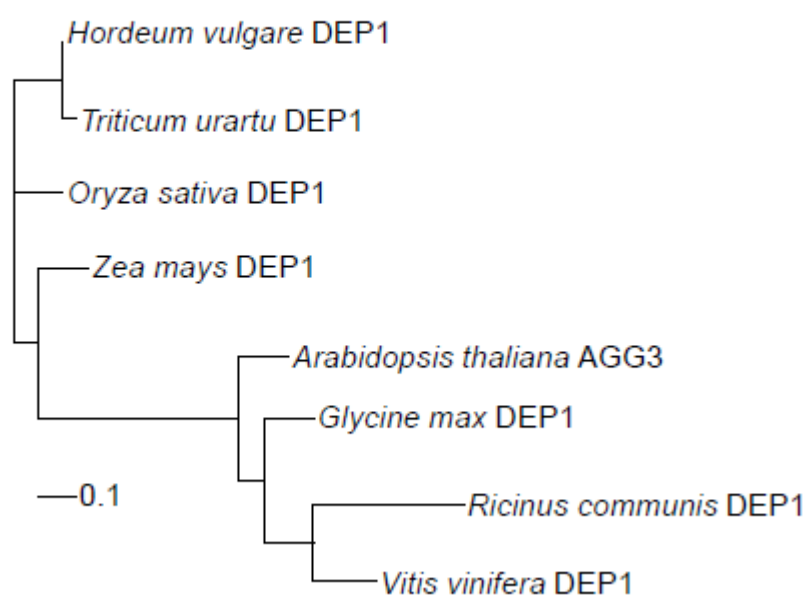

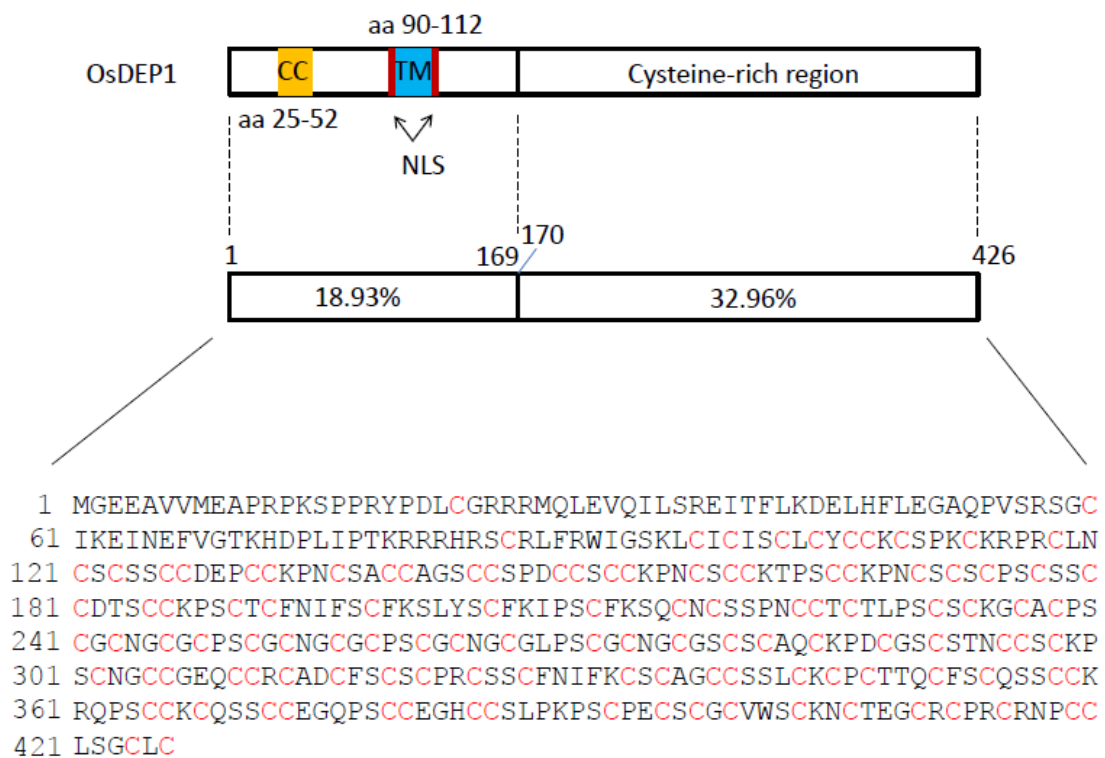

**Fig. S2**

Fig S3

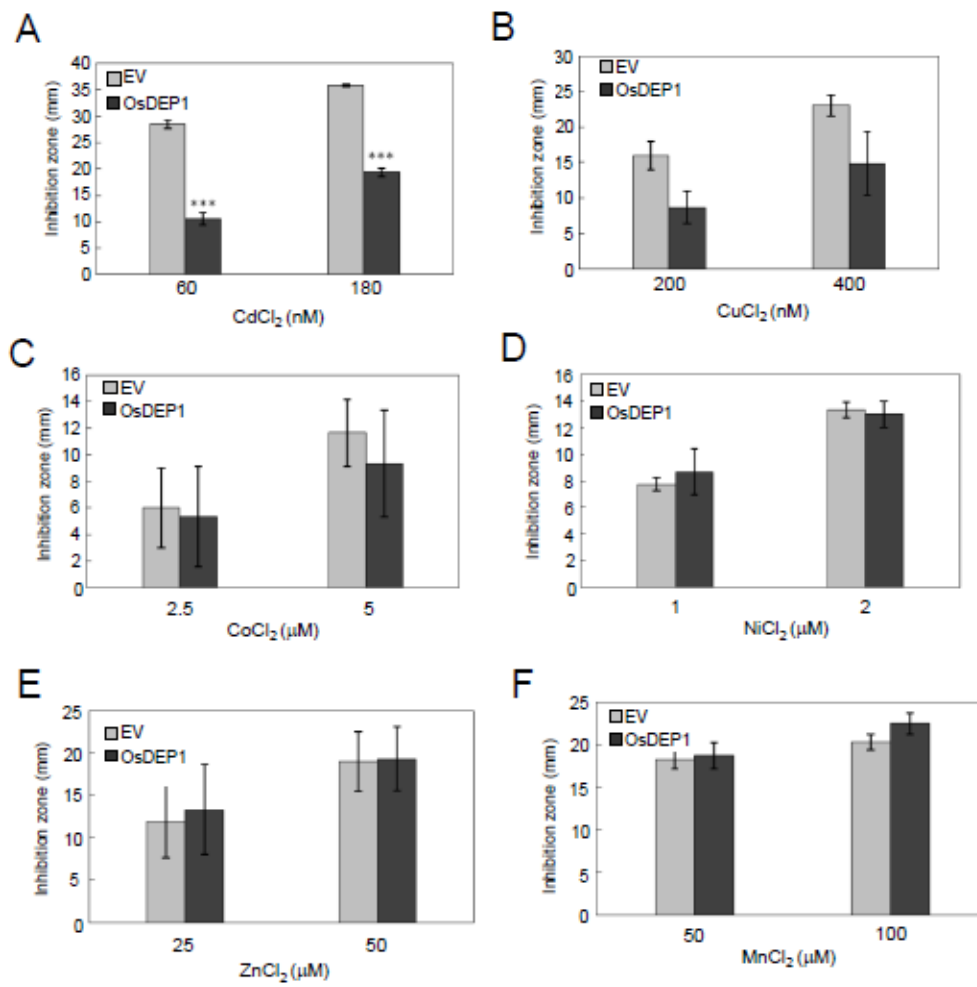

Fig S4

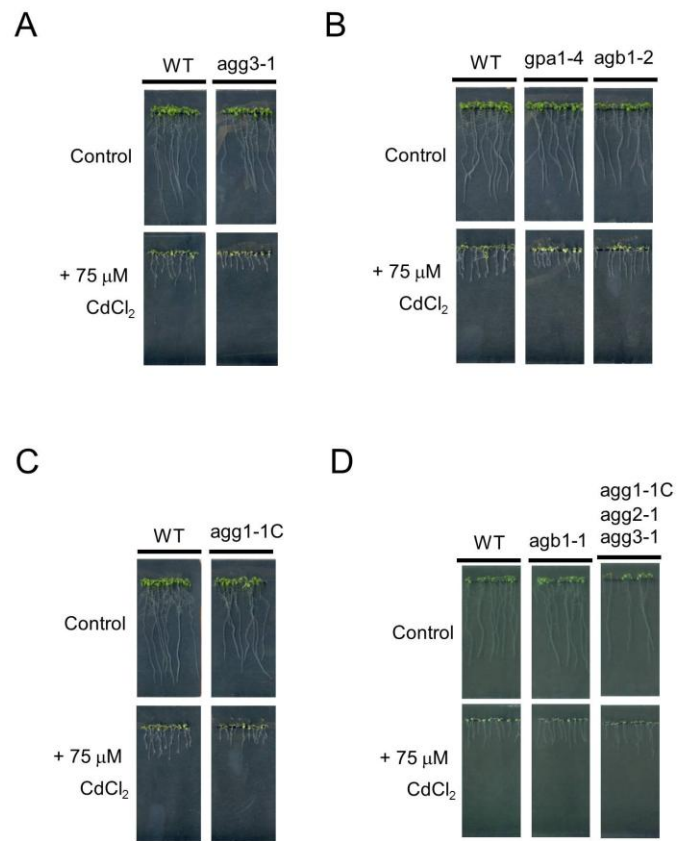

Fig. S4.
